# Supplementary material for: Type I interferon response gene expression in established rheumatoid arthritis is not associated with clinical parameters
Source: Springer Nature journal article supplement (doi:10.1186/s13075-016-1191-y), 2016-12-01
Supplement: MOESM1 [file 11931296]

**SUPPLEMENTARY TABLES**

| <b>Table S1</b> List of the 19 IFN response genes measured |                                                              |
|------------------------------------------------------------|--------------------------------------------------------------|
| <b>Gene Symbol</b>                                         | <b>Gene Name</b>                                             |
| EPSTI1                                                     | epithelial stromal interaction 1                             |
| HERC5                                                      | HECT and RLD domain containing E3 ubiquitin protein ligase 5 |
| IFI35                                                      | interferon-induced protein 35                                |
| IFI44                                                      | interferon-induced protein 44                                |
| IFI44L                                                     | interferon-induced protein 44-like                           |
| IFI6                                                       | interferon, alpha-inducible protein 6                        |
| IFIT1                                                      | interferon-induced protein with tetratricopeptide repeats 1  |
| IFITM1                                                     | interferon induced transmembrane protein 1                   |
| IL1RN                                                      | interleukin 1 receptor antagonist                            |
| ISG15                                                      | ISG15 ubiquitin-like modifier                                |
| LGALS3BP                                                   | lectin, galactoside-binding, soluble, 3 binding protein      |
| LY6E                                                       | lymphocyte antigen 6 complex, locus E                        |
| MX1                                                        | MX dynamin-like GTPase 1                                     |
| MX2                                                        | MX dynamin-like GTPase 2                                     |
| OAS1                                                       | 2'-5'-oligoadenylate synthetase 1, 40/46kDa                  |
| OAS2                                                       | 2'-5'-oligoadenylate synthetase 2, 69/71kDa                  |
| RSAD2                                                      | radical S-adenosyl methionine domain containing 2            |
| SAMD9L                                                     | sterile alpha motif domain containing 9-like                 |
| SERPING1                                                   | serpin peptidase inhibitor, clade G (C1 inhibitor), member 1 |

**Table S2** Analysis results of associations between IFN score and clinical parameters after 1000 times of random sampling using only patients that were not treated with prednisone, HCQ or SSZ.

|                                          | Complete group<br>(n=95) | Cross-validation                |              |            |                 |       |
|------------------------------------------|--------------------------|---------------------------------|--------------|------------|-----------------|-------|
|                                          |                          | Significant results<br>(p<0.05) |              |            | Median p values |       |
|                                          |                          | P value                         | Both<br>sets | One<br>set | Neither<br>set  | Set 1 |
| <b>Disease parameters</b>                |                          |                                 |              |            |                 |       |
| Disease duration                         | 0.63                     | 2                               | 13           | 985        | 0.61            | 0.59  |
| DAS28                                    | 0.30                     | 0                               | 122          | 878        | 0.42            | 0.46  |
| TJC28                                    | 0.099                    | 0                               | 256          | 744        | 0.23            | 0.27  |
| SJC28                                    | 0.98                     | 12                              | 15           | 973        | 0.62            | 0.61  |
| VAS                                      | 0.61                     | 4                               | 27           | 969        | 0.57            | 0.55  |
| Erosions                                 | 0.26                     | 0                               | 107          | 893        | 0.43            | 0.40  |
| Nodules                                  | 0.23                     | 1                               | 129          | 870        | 0.40            | 0.39  |
| <b>Laboratory parameters</b>             |                          |                                 |              |            |                 |       |
| ESR                                      | 0.79                     | 4                               | 19           | 977        | 0.59            | 0.58  |
| ESR dichotomous (>20)                    | 0.69                     | 2                               | 14           | 984        | 0.60            | 0.59  |
| CRP                                      | 0.59                     | 0                               | 41           | 959        | 0.56            | 0.55  |
| CRP dichotomous (>10)                    | 0.77                     | 2                               | 8            | 990        | 0.60            | 0.59  |
| RF titer                                 | 0.56                     | 2                               | 49           | 949        | 0.54            | 0.55  |
| RF positivity                            | 0.65                     | 1                               | 30           | 969        | 0.59            | 0.59  |
| ACPA titer                               | 0.63                     | 2                               | 27           | 971        | 0.59            | 0.59  |
| ACPA positivity                          | 0.74                     | 0                               | 12           | 988        | 0.62            | 0.62  |
| ACPA high positivity ( $\geq 3x$ cutoff) | 0.19                     | 0                               | 126          | 874        | 0.33            | 0.39  |
| RF and ACPA positive vs. rest            | 0.86                     | 3                               | 18           | 979        | 0.63            | 0.64  |
| RF and ACPA negative vs. rest            | 0.33                     | 0                               | 53           | 947        | 0.47            | 0.48  |
| <b>Medication parameters</b>             |                          |                                 |              |            |                 |       |
| MTX use                                  | 0.94                     | 1                               | 4            | 995        | 0.66            | 0.65  |
| MTX dosage                               | 0.63                     | 1                               | 20           | 979        | 0.60            | 0.60  |
